# Supplementary material for: An asymmetric graphene oxide film for developing moisture actuators
Source: Royal Society of Chemistry journal article supplement (doi:10.1039/c8nr01785a), 2018-01-01
Supplement: c8nr01785a2.pdf [file c8nr01785a2.pdf]

## ***Supporting Information***

### **An Asymmetric Graphene Oxide Film for Moisture Actuator**

Yuanyou Qiu<sup>†</sup>, Mingti Wang<sup>†</sup>, Wenzheng Zhang, Yangxiu Liu, Yan Vivian Li, and

Kai Pan\*

Y. Qiu, M. Wang, W. Zhang, Y. Liu, and Prof. K. Pan

State Key Laboratory of Organic-Inorganic Composites, Beijing Key Laboratory of  
Advanced Functional Polymer Composites, and College of Materials Science and  
Engineering, Beijing University of Chemical Technology, Beijing, 100029, China

E-mail: [pankai@mail.buct.edu.cn](mailto:pankai@mail.buct.edu.cn)

Prof. Y. V. Li

Design and Merchandising, Colorado State University,

School of Biomedical Engineering, Colorado State University,

School of Advanced Materials Discovery, Colorado State University,

Fort Collins, Colorado, 80524, USA

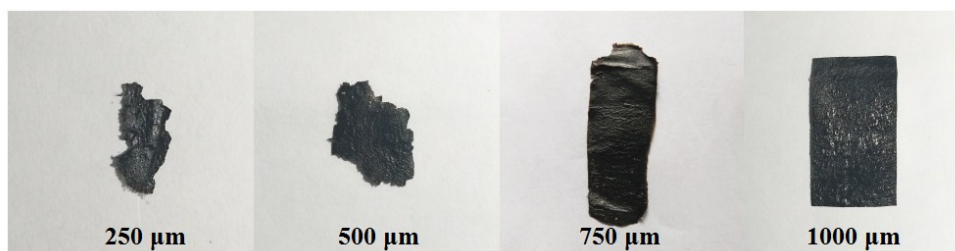

**Figure S1.** The aqueous GO suspension was coated on the substrate with a thickness of 250, 500, 750 and 1000  $\mu\text{m}$  and their corresponding photographs of AGO films.

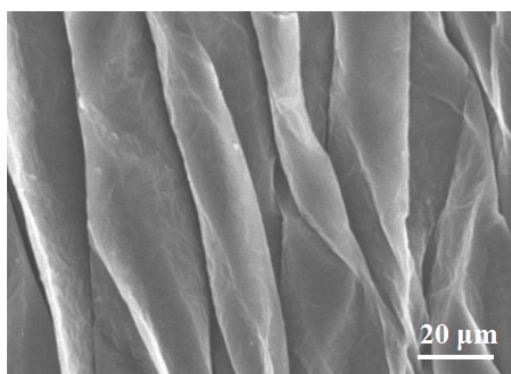

**Figure S2.** SEM image of the wavy GO film.

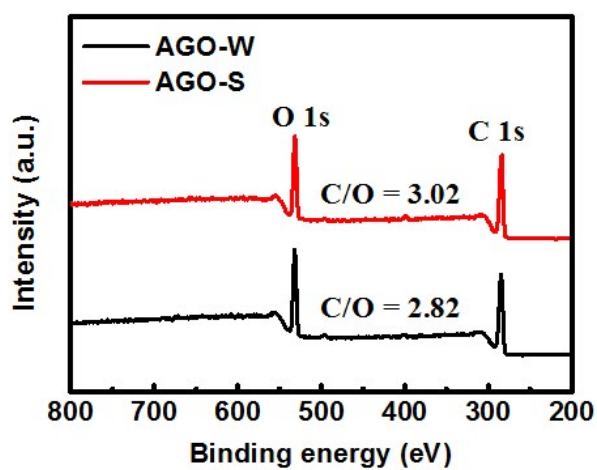

**Figure S3.** Survey XPS spectra of AGO-S and AGO-W.
